# Supplementary material for: Evaluation of Wound Healing Potential of Novel Hydrogel Based on Ocimum basilicum and Trifolium pratense Extracts
Source: MDPI journal article supplement (doi:10.3390/pr9112096), 2021-11-22
Supplement: s1 [file s1]

**Supplementary material S2: The details of the computational analysis and the exact values of the norm  $L^p$  calculated for  $p = 2.5$ , within the definition interval  $[0; 1]$**

**Table S1.** Computational results for image analysis of fibroblasts migration, with respect to statistical factor “*Sample*” (means  $\pm$  SD,  $n = 12$ ).

| Factor:<br>Sample | Wound Closure<br>by Width (%) | Wound Closure<br>by Area (%) | Normalized Cell<br>Density (%) | $L^p$ -norm          |
|-------------------|-------------------------------|------------------------------|--------------------------------|----------------------|
| C50               | 71.17a<br>$\pm 41.578$        | 73.56a<br>$\pm 40.344$       | 76.60a<br>$\pm 43.933$         | 0.74a $\pm$<br>0.413 |
| CTRL              | 70.88a<br>$\pm 41.567$        | 69.03b<br>$\pm 39.561$       | 62.79b<br>$\pm 35.559$         | 0.68b $\pm$<br>0.381 |
| CTRL0             | 57.30b<br>$\pm 43.414$        | 52.96c<br>$\pm 42.350$       | 30.64c<br>$\pm 23.673$         | 0.49c $\pm$<br>0.379 |

Note: different letters mean statistically significant different. Multiple comparisons test results were done with *post-hoc* Duncan ( $P = 0.05$ ).

**Table S2.** Computer results for image analysis of fibroblasts migration by “*Time*” factor levels (means  $\pm$  SD,  $n = 22$ ).

| Factor:<br>time | Wound Closure<br>by Width (%) | Wound Closure<br>by Area (%) | Normalized Cell<br>Density (%) | $L^p$ -norm          |
|-----------------|-------------------------------|------------------------------|--------------------------------|----------------------|
| T00             | 0.00d<br>$\pm 0.000$          | 0.00d<br>$\pm 0.000$         | 0.00d<br>$\pm 0.000$           | 0.00d $\pm$<br>0.000 |
| T12             | 24.31c<br>$\pm 6.060$         | 27.86c<br>$\pm 18.813$       | 31.13c<br>$\pm 22.445$         | 0.29c $\pm$<br>0.159 |
| T24             | 74.40b<br>$\pm 35.582$        | 69.33b<br>$\pm 34.210$       | 52.09b<br>$\pm 29.705$         | 0.67b $\pm$<br>0.327 |
| T36             | 100.00a<br>$\pm 0.000$        | 96.86a<br>$\pm 3.927$        | 81.76a<br>$\pm 29.084$         | 0.95a $\pm$<br>0.087 |
| T48             | 100.00a<br>$\pm 0.000$        | 97.09a<br>$\pm 3.340$        | 85.72a<br>$\pm 24.476$         | 0.96a $\pm$<br>0.081 |
| T60             | 100.00a<br>$\pm 0.000$        | 99.97a<br>$\pm 0.054$        | 89.35a<br>$\pm 21.853$         | 0.97a $\pm$<br>0.062 |

Note: different letters mean statistically significant different. Multiple comparisons test results were done with *post-hoc* Duncan ( $P = 0.05$ ).

**Table S3.** Computer results for image analysis of fibroblasts migration, by “*Sample\*Time*” factor levels (means  $\pm$  SD,  $n = 2$ ).

| Factor:<br>Sample*Time | Wound Closure<br>by Width (%) | Wound Closure<br>by Area (%) | Normalized Cell<br>Density (%) | $L^p$ -norm            |
|------------------------|-------------------------------|------------------------------|--------------------------------|------------------------|
| C50_T00                | 0.00d<br>$\pm 0.000$          | 0.00e<br>$\pm 0.000$         | 0.00ab<br>$\pm 0.000$          | 0.00h<br>$\pm 0.000$   |
| C50_T12                | 27.05b<br>$\pm 5.980$         | 41.48c<br>$\pm 23.126$       | 42.52a<br>$\pm 15.807$         | 0.39f<br>$\pm 0.157$   |
| C50_T24                | 100.00a<br>$\pm 0.000$        | 99.93a<br>$\pm 0.119$        | 78.37a<br>$\pm 13.286$         | 0.94bcd<br>$\pm 0.036$ |
| C50_T36                | 100.00a<br>$\pm 0.000$        | 99.98a<br>$\pm 0.030$        | 111.34a<br>$\pm 8.741$         | 1.04a<br>$\pm 0.033$   |
| C50_T48                | 100.00a                       | 100.00a                      | 114.47a                        | 1.05a                  |

| <b>Factor:<br/>Sample*Time</b> | <b>Wound Closure<br/>by Width (%)</b> | <b>Wound Closure<br/>by Area (%)</b> | <b>Normalized Cell<br/>Density (%)</b> | <b><i>L<sup>p</sup></i>-norm</b> |
|--------------------------------|---------------------------------------|--------------------------------------|----------------------------------------|----------------------------------|
|                                | ± 0.000                               | ± 0.000                              | ± 7.722                                | ± 0.030                          |
| <b>C50_T60</b>                 | 100.00a                               | 99.99a                               | 112.88a                                | 1.05a                            |
|                                | ± 0.000                               | ± 0.020                              | ± 5.304                                | ± 0.020                          |
| <b>CTRL_T00</b>                | 0.00d                                 | 0.00e                                | 0.00b                                  | 0.00h                            |
|                                | ± 0.000                               | ± 0.000                              | ± 0.000                                | ± 0.000                          |
| <b>CTRL_T12</b>                | 26.28b                                | 31.69cd                              | 41.94a                                 | 0.35f                            |
|                                | ± 4.048                               | ± 4.661                              | ± 22.845                               | ± 0.127                          |
| <b>CTRL_T24</b>                | 99.03a                                | 84.69b                               | 62.92a                                 | 0.85de                           |
|                                | ± 0.980                               | ± 14.738                             | ± 16.875                               | ± 0.089                          |
| <b>CTRL_T36</b>                | 100.00a                               | 99.15a                               | 90.57a                                 | 0.97ab                           |
|                                | ± 0.000                               | ± 1.291                              | ± 5.800                                | ± 0.015                          |
| <b>CTRL_T48</b>                | 100.00a                               | 98.72a                               | 86.84a                                 | 0.95abc                          |
|                                | ± 0.000                               | ± 1.280                              | ± 3.676                                | ± 0.015                          |
| <b>CTRL_T60</b>                | 100.00a                               | 99.92a                               | 94.46a                                 | 0.98ab                           |
|                                | ± 0.000                               | ± 0.070                              | ± 1.667                                | ± 0.005                          |
| <b>CTRL0_T00</b>               | 0.00d                                 | 0.00e                                | 0.00b                                  | 0.00h                            |
|                                | ± 0.000                               | ± 0.000                              | ± 0.000                                | ± 0.000                          |
| <b>CTRL0_T12</b>               | 19.60c                                | 10.41e                               | 8.93ab                                 | 0.14g                            |
|                                | ± 4.949                               | ± 0.920                              | ± 0.231                                | ± 0.025                          |
| <b>CTRL0_T24</b>               | 24.17b                                | 23.36d                               | 14.97ab                                | 0.21g                            |
|                                | ± 3.474                               | ± 2.867                              | ± 0.057                                | ± 0.025                          |
| <b>CTRL0_T36</b>               | 100.00a                               | 91.44ab                              | 43.36a                                 | 0.84e                            |
|                                | ± 0.000                               | ± 0.475                              | ± 0.621                                | ± 0.003                          |
| <b>CTRL0_T48</b>               | 100.00a                               | 92.55ab                              | 55.85a                                 | 0.86cde                          |
|                                | ± 0.000                               | ± 0.222                              | ± 1.966                                | ± 0.004                          |
| <b>CTRL0_T60</b>               | 100.00a                               | 100.00a                              | 60.70a                                 | 0.90bcde                         |
|                                | ± 0.000                               | ± 0.000                              | ± 1.118                                | ± 0.002                          |

Note: different letters mean statistically significant different. Multiple comparisons test results were done with post-hoc Duncan (P = 0.05).

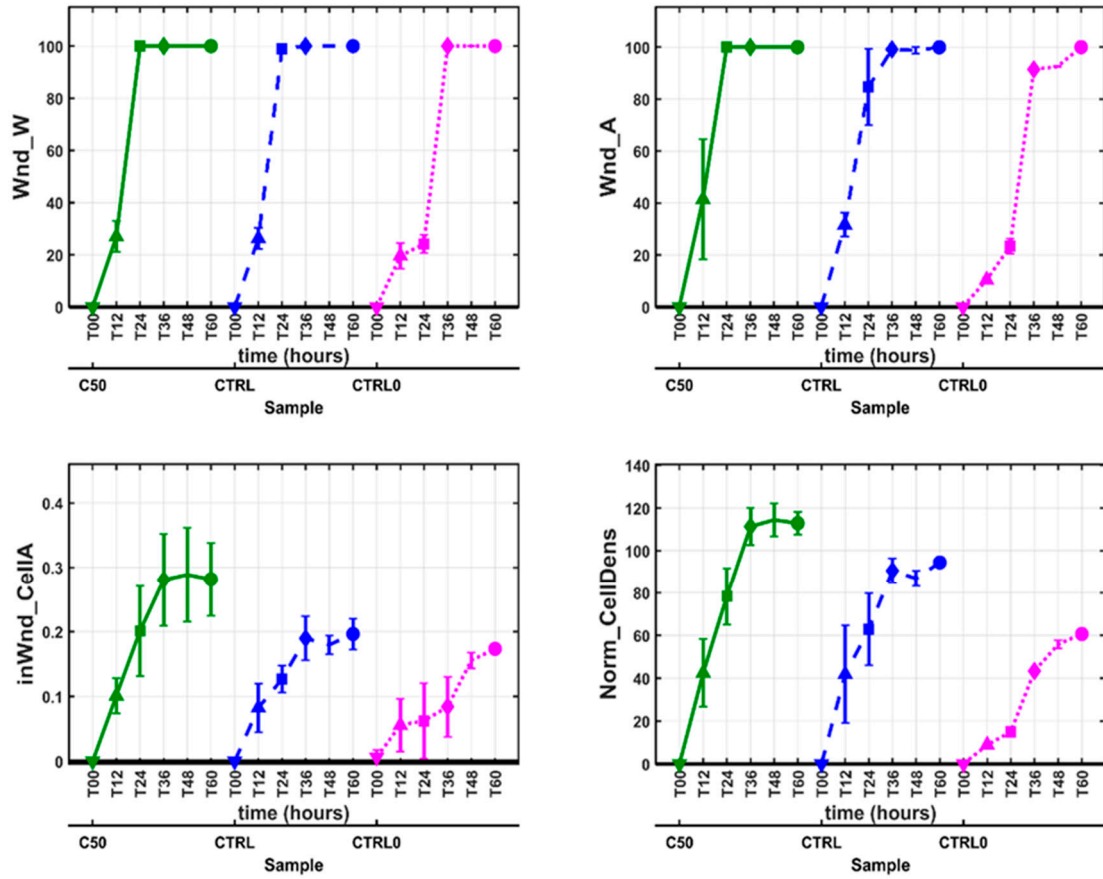

**Figure S11.** Interval plots representing the percentage of wound closure by width, area, cells inside the wound and  $L^p$  norm.

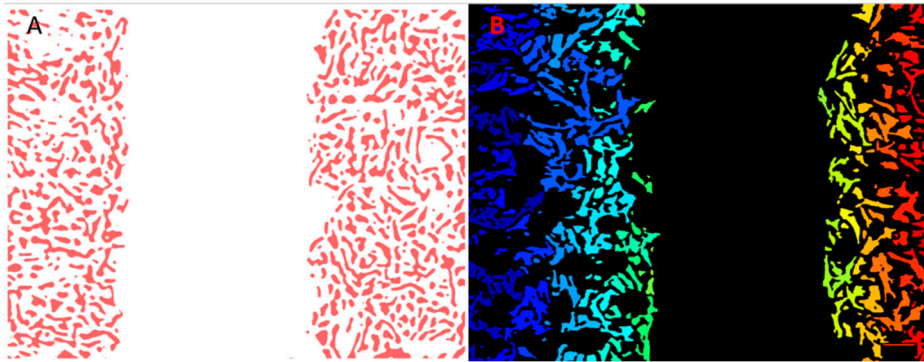

**Figure S12.** Processing the image of C50 sample at T00, by pointing out the exact position of the cells inside, outside or at the edge of the wound area.
