# Supplementary material for: Evaluation of Wound Healing Potential of Novel Hydrogel Based on Ocimum basilicum and Trifolium pratense Extracts
Source: MDPI journal article supplement (doi:10.3390/pr9112096), 2021-11-22
Supplement: s1 [file s1]

**Results of the preliminary *in vitro* tests using different EOT concentrations (12.5 ug / ml, 25 ug / ml, 50 ug / ml).**

**Table S1.** Variation of the average width of the wound relative to that of the initial moment (T00), for the analyzed samples (mean  $\pm$  standard deviation, N = 2). Results are presented for the Time factor from bivariate variance analysis (ANOVA).

| <b>Wound coverage, Relative width (%)</b> | <b>C50</b>              | <b>C25</b>              | <b>C12.5</b>           | <b>CTRL</b>            | <b>CTRL0</b>           |
|-------------------------------------------|-------------------------|-------------------------|------------------------|------------------------|------------------------|
| <b>T00</b>                                | 0.00e<br>$\pm$ 0.000    | 0.00e<br>$\pm$ 0.000    | 0.00e<br>$\pm$ 0.000   | 0.00e<br>$\pm$ 0.000   | 0.00e<br>$\pm$ 0.000   |
| <b>T12</b>                                | 41.56cd<br>$\pm$ 33.808 | 41.74cd<br>$\pm$ 14.434 | 67.46b<br>$\pm$ 5.776  | 45.70c<br>$\pm$ 31.519 | 24.59d<br>$\pm$ 0.037  |
| <b>T24</b>                                | 100.00a<br>$\pm$ 0.000  | 80.26ab<br>$\pm$ 19.892 | 92.03a<br>$\pm$ 7.968  | 100.00a<br>$\pm$ 0.000 | 28.80cd<br>$\pm$ 1.158 |
| <b>T36</b>                                | 100.00a<br>$\pm$ 0.000  | 100.00a<br>$\pm$ 0.000  | 100.00a<br>$\pm$ 0.000 | 100.00a<br>$\pm$ 0.000 | 100.00a<br>$\pm$ 0.000 |
| <b>T48</b>                                | 100.00a<br>$\pm$ 0.000  | 100.00a<br>$\pm$ 0.000  | 100.00a<br>$\pm$ 0.000 | 100.00a<br>$\pm$ 0.000 | 100.00a<br>$\pm$ 0.000 |
| <b>T60</b>                                | 100.00a<br>$\pm$ 0.000  | 100.00a<br>$\pm$ 0.000  | 100.00a<br>$\pm$ 0.000 | 100.00a<br>$\pm$ 0.000 | 100.00a<br>$\pm$ 0.000 |

**Note:** The different letters that accompany the mean values denote statistically significantly different mean values; these results come from the multiple comparison of the means with the Duncan test (P = 0.05) performed post hoc bivariate analysis of variance (ANOVA) (P = 0.05).

**Table S2.** The variation of the average normalized density of the cells in the initial surface of the wound (mean  $\pm$  standard deviation, N = 2), relative to the density measured prior to wound production. Results are presented for the Sample factor \* Time from bivariate variance analysis (ANOVA).

| <b>Normalize Density of Cells (%)</b> | <b>C50</b> | <b>C25</b> | <b>C12.5</b> | <b>CTRL</b> | <b>CTRL0</b> |
|---------------------------------------|------------|------------|--------------|-------------|--------------|
| <b>T00</b>                            | 0.00b      | 0.00b      | 0.00ab       | 0.00ab      | 0.00ab       |

|            |                     |                     |                     |                    |                    |
|------------|---------------------|---------------------|---------------------|--------------------|--------------------|
|            | ± 0.000             | ± 0.000             | ± 0.000             | ± 0.000            | ± 0.000            |
| <b>T12</b> | 43.97a<br>± 14.283  | 46.51a<br>± 7.587   | 49.04a<br>± 14.142  | 42.91a<br>± 22.056 | 8.94ab<br>± 0.544  |
| <b>T24</b> | 80.07a<br>± 13.248  | 63.62a<br>± 14.471  | 74.30a<br>± 15.312  | 73.63a<br>± 9.135  | 14.98ab<br>± 0.557 |
| <b>T36</b> | 109.42a<br>± 4.233  | 90.17a<br>± 4.456   | 85.01a<br>± 10.243  | 81.89a<br>± 3.283  | 43.41a<br>± 2.210  |
| <b>T48</b> | 117.87a<br>± 12.002 | 97.16a<br>± 1.518   | 94.60a<br>± 7.954   | 86.13a<br>± 4.516  | 55.95a<br>± 3.874  |
| <b>T60</b> | 128.72a<br>± 15.800 | 117.81a<br>± 14.556 | 106.21a<br>± 11.641 | 92.70a<br>± 4.128  | 70.11a<br>± 4.052  |

**Note:** The different letters that accompany the mean values denote statistically significantly different mean values; these results come from the multiple comparison of the means with the Duncan test ( $P = 0.05$ ) performed post hoc bivariate analysis of variance (ANOVA) ( $P = 0.05$ ).

**Table S3.** Classification of the quality of wound closure according to the Sample factor, according to the value of the  $L_p$  norm calculated with the values of the three normalized variables.

| <b>Factor:<br/>Sample</b> | <b>Wound<br/>coverage,<br/>Relative width<br/>(%)</b> | <b>Wound<br/>coverage,<br/>Area (%)</b> | <b>Normalized<br/>Density (%)</b> | <b>Cell<br/><math>L^p</math>- norm<br/><math>p = 2,5</math></b> |
|---------------------------|-------------------------------------------------------|-----------------------------------------|-----------------------------------|-----------------------------------------------------------------|
| <b>C50</b>                | 73.5932                                               | 73.3677                                 | 80.0092                           | 0.7644                                                          |
| <b>C12.5</b>              | 76.5829                                               | 75.3847                                 | 68.1925                           | 0.7392                                                          |
| <b>CTRL</b>               | 74.2827                                               | 73.8357                                 | 62.8761                           | 0.7138                                                          |
| <b>C25</b>                | 70.3340                                               | 69.0682                                 | 69.2126                           | 0.6987                                                          |
| <b>CTRL0</b>              | 58.8981                                               | 53.7286                                 | 32.2320                           | 0.5049                                                          |
