# Supplementary material for: Evaluation of Wound Healing Potential of Novel Hydrogel Based on Ocimum basilicum and Trifolium pratense Extracts
Source: MDPI journal article supplement (doi:10.3390/pr9112096), 2021-11-22
Supplement: s1 [file s1]

## Supplementary material S3: Multivariate Statistical Analysis and Hierarchical Cluster Analysis parameters

**Table S5.** MANOVA (P = 0.05) method statistical significance *p*-values generated *post-hoc* pairwise multiple comparisons.

| MANOVA,<br><i>p</i> -values                                                                                                                                                                                      | C50_T00 | C50_T12 | C50_T24 | C50_T36 | C50_T48 | C50_T60 | CTRL_T00 | CTRL_T12 | CTRL_T24 | CTRL_T36 | CTRL_T48 | CTRL_T60 | CTRL0_T00 | CTRL0_T12 | CTRL0_T24 | CTRL0_T36 | CTRL0_T48 | CTRL0_T60 |
|------------------------------------------------------------------------------------------------------------------------------------------------------------------------------------------------------------------|---------|---------|---------|---------|---------|---------|----------|----------|----------|----------|----------|----------|-----------|-----------|-----------|-----------|-----------|-----------|
| C50_T00                                                                                                                                                                                                          |         | 0.0000  | 0.0000  | 0.0000  | 0.0000  | 0.0000  | 1.0000   | 0.0000   | 0.0000   | 0.0000   | 0.0000   | 0.0000   | 0.9902    | 0.0000    | 0.0000    | 0.0000    | 0.0000    | 0.0000    |
| C50_T12                                                                                                                                                                                                          | 0.0000  |         | 0.0000  | 0.0000  | 0.0000  | 0.0000  | 0.0000   | 0.0586   | 0.0000   | 0.0000   | 0.0000   | 0.0000   | 0.0000    | 0.0000    | 0.0010    | 0.0000    | 0.0000    | 0.0000    |
| C50_T24                                                                                                                                                                                                          | 0.0000  | 0.0000  |         | 0.0000  | 0.0000  | 0.0000  | 0.0000   | 0.0000   | 0.0105   | 0.0103   | 0.0313   | 0.0027   | 0.0000    | 0.0000    | 0.0000    | 0.0001    | 0.0037    | 0.0044    |
| C50_T36                                                                                                                                                                                                          | 0.0000  | 0.0000  | 0.0000  |         | 0.8877  | 0.9770  | 0.0000   | 0.0000   | 0.0000   | 0.0020   | 0.0006   | 0.0066   | 0.0000    | 0.0000    | 0.0000    | 0.0000    | 0.0000    | 0.0000    |
| C50_T48                                                                                                                                                                                                          | 0.0000  | 0.0000  | 0.0000  | 0.8877  |         | 0.9817  | 0.0000   | 0.0000   | 0.0000   | 0.0007   | 0.0002   | 0.0021   | 0.0000    | 0.0000    | 0.0000    | 0.0000    | 0.0000    | 0.0000    |
| C50_T60                                                                                                                                                                                                          | 0.0000  | 0.0000  | 0.0000  | 0.9770  | 0.9817  |         | 0.0000   | 0.0000   | 0.0000   | 0.0012   | 0.0004   | 0.0040   | 0.0000    | 0.0000    | 0.0000    | 0.0000    | 0.0000    | 0.0000    |
| CTRL_T00                                                                                                                                                                                                         | 1.0000  | 0.0000  | 0.0000  | 0.0000  | 0.0000  | 0.0000  |          | 0.0000   | 0.0000   | 0.0000   | 0.0000   | 0.0000   | 0.9902    | 0.0000    | 0.0000    | 0.0000    | 0.0000    | 0.0000    |
| CTRL_T12                                                                                                                                                                                                         | 0.0000  | 0.0586  | 0.0000  | 0.0000  | 0.0000  | 0.0000  | 0.0000   |          | 0.0000   | 0.0000   | 0.0000   | 0.0000   | 0.0000    | 0.0001    | 0.0005    | 0.0000    | 0.0000    | 0.0000    |
| CTRL_T24                                                                                                                                                                                                         | 0.0000  | 0.0000  | 0.0105  | 0.0000  | 0.0000  | 0.0000  | 0.0000   | 0.0000   |          | 0.0014   | 0.8549   | 0.8419   | 0.0000    | 0.0000    | 0.0000    | 0.0000    | 0.0000    | 0.0000    |
| CTRL_T36                                                                                                                                                                                                         | 0.0000  | 0.0000  | 0.0103  | 0.0020  | 0.0007  | 0.0012  | 0.0000   | 0.0000   | 0.0014   |          | 0.8549   | 0.8419   | 0.0000    | 0.0000    | 0.0000    | 0.0000    | 0.0000    | 0.0000    |
| CTRL_T48                                                                                                                                                                                                         | 0.0000  | 0.0000  | 0.0313  | 0.0006  | 0.0002  | 0.0004  | 0.0000   | 0.0000   | 0.0045   | 0.8549   |          | 0.4048   | 0.0000    | 0.0000    | 0.0000    | 0.0000    | 0.0001    | 0.0000    |
| CTRL_T60                                                                                                                                                                                                         | 0.0000  | 0.0000  | 0.0027  | 0.0066  | 0.0021  | 0.0040  | 0.0000   | 0.0000   | 0.0004   | 0.8419   | 0.4048   |          | 0.0000    | 0.0000    | 0.0000    | 0.0000    | 0.0000    | 0.0000    |
| CTRL0_T00                                                                                                                                                                                                        | 0.9902  | 0.0000  | 0.0000  | 0.0000  | 0.0000  | 0.0000  | 0.9902   | 0.0000   | 0.0000   | 0.0000   | 0.0000   | 0.0000   |           | 0.0000    | 0.0000    | 0.0000    | 0.0000    | 0.0000    |
| CTRL0_T12                                                                                                                                                                                                        | 0.0000  | 0.0000  | 0.0000  | 0.0000  | 0.0000  | 0.0000  | 0.0000   | 0.0001   | 0.0000   | 0.0000   | 0.0000   | 0.0000   | 0.0000    |           | 0.1100    | 0.0000    | 0.0000    | 0.0000    |
| CTRL0_T24                                                                                                                                                                                                        | 0.0000  | 0.0010  | 0.0000  | 0.0000  | 0.0000  | 0.0000  | 0.0000   | 0.0005   | 0.0000   | 0.0000   | 0.0000   | 0.0000   | 0.0000    | 0.1100    |           | 0.0000    | 0.0000    | 0.0000    |
| CTRL0_T36                                                                                                                                                                                                        | 0.0000  | 0.0000  | 0.0001  | 0.0000  | 0.0000  | 0.0000  | 0.0000   | 0.0000   | 0.0002   | 0.0000   | 0.0000   | 0.0000   | 0.0000    | 0.0000    | 0.0000    |           | 0.0391    | 0.0127    |
| CTRL0_T48                                                                                                                                                                                                        | 0.0000  | 0.0000  | 0.0037  | 0.0000  | 0.0000  | 0.0000  | 0.0000   | 0.0000   | 0.0029   | 0.0000   | 0.0001   | 0.0000   | 0.0000    | 0.0000    | 0.0000    | 0.0391    |           | 0.4757    |
| CTRL0_T60                                                                                                                                                                                                        | 0.0000  | 0.0000  | 0.0044  | 0.0000  | 0.0000  | 0.0000  | 0.0000   | 0.0000   | 0.0006   | 0.0000   | 0.0000   | 0.0000   | 0.0000    | 0.0000    | 0.0000    | 0.0127    | 0.4757    |           |
| Cluster_#1 Cluster_#2 Cluster_#3 Cluster_#4 Cluster_#4 Cluster_#4 Cluster_#1 Cluster_#2 Cluster_#5 Cluster_#6 Cluster_#6 Cluster_#6 Cluster_#6 Cluster_#1 Cluster_#7 Cluster_#7 Cluster_#8 Cluster_#9 Cluster_#9 |         |         |         |         |         |         |          |          |          |          |          |          |           |           |           |           |           |           |

**Table S6.** Agglomerative hierarchical cluster analysis (AHC) results on PC1÷PC3 principal coordinates as MANOVA's input.

| Cluster_#1 | Cluster_#2 | Cluster_#3 | Cluster_#4 | Cluster_#5 | Cluster_#6 | Cluster_#7 | Cluster_#8 | Cluster_#9 |
|------------|------------|------------|------------|------------|------------|------------|------------|------------|
| C50_T2     | CTRL_T     | CTRL_T     | CTRL0_T    | CTRL0_T    | C50_T1     | CTRL0_T    |            | C50_T3     |
| 4          | 36         | 24         | T48        | T36        | 2          | T12        | C50_T00    | 6          |
|            | CTRL_T     |            | CTRL0_T    |            | CTRL_T     | CTRL0_T    | CTRL_T     | C50_T4     |
|            | 48         |            | T60        |            | 12         | T24        | 00         | 8          |
|            | CTRL_T     |            |            |            |            |            | CTRL0_T    | C50_T6     |
|            | 60         |            |            |            |            |            | T00        | 0          |

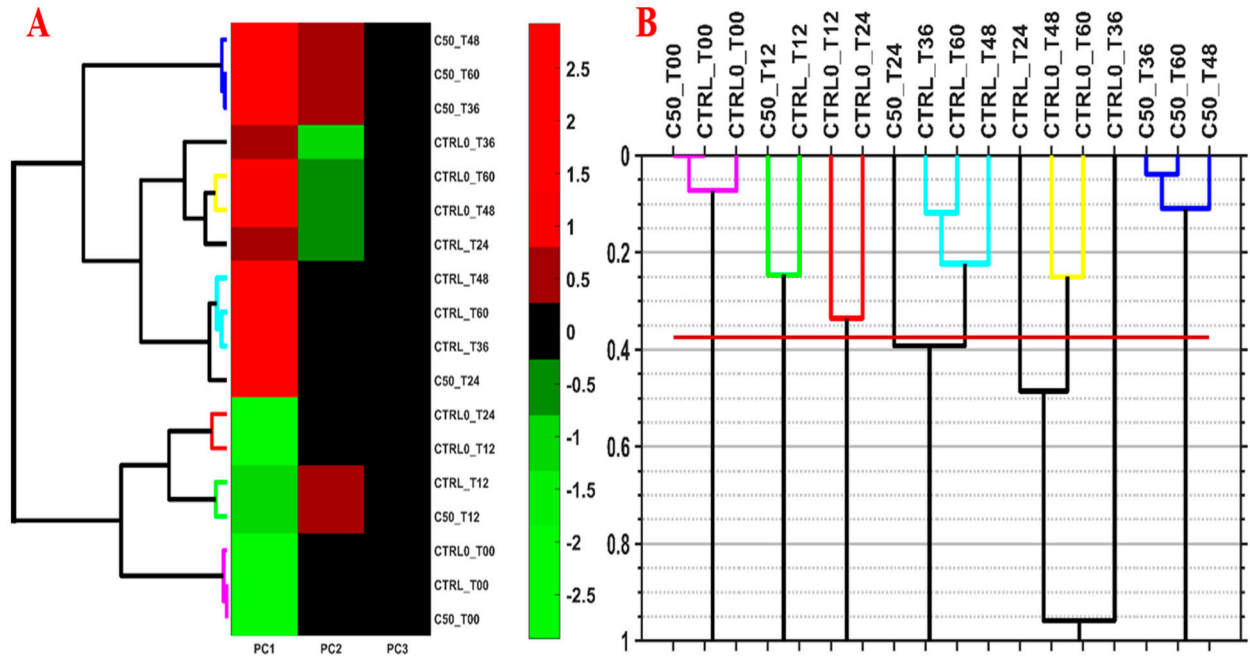

**Figure S13.** Cluster analysis of MANOVA ( $P = 0.05$ ) results (A) Heatmap representation for Canon1 ÷ Canon4 canonical coordinates; (B) Dendrogram representation for Canon1 ÷ Canon4 canonical coordinates with the cut-off red line that generates the clusters.

The canonical coordinates are the ones that increase the variance-covariance level and perform the highest Euclidean distance between the sample groups. Furthermore, the AHC clustering method was used on the Canon1 to Canon3 coordinate values. In consequence, the proper number of the sample clusters was generated. The AHC results are presented as heat map with a dendrogram (**Figure S13a**) and a simple dendrogram with the cut-off similarity distance value (**Figure S13b**) used to obtain the proper number of clusters, based on MANOVA's p-values matrix.
